# Supplementary material
Source: HighWire-hosted journal article supplement (http://www.cmajopen.ca/highwire/filestream/86693/field_highwire_adjunct_files/2/2020-0228_original_submission.pdf)
Supplement: 2020-0228_original_submission.pdf [file 2020-0228_original_submission.pdf]

1  
2  
3 **Description of the What Comes Next Cohort: A longitudinal study of healthcare utilization**  
4 **and outcomes after *BRCA1* and *BRCA2* testing**  
5

6  
7 Fahima Dossa, MD<sup>1,2</sup>; Kelly Metcalfe, PhD<sup>3</sup>; Rinku Sutradhar, PhD<sup>2,4,5</sup>; Tari Little, BSc<sup>6</sup>;  
8  
9 Andrea Eisen, MD<sup>7</sup>; Kathy Chun, PhD<sup>8</sup>; Wendy S. Meschino, MD<sup>9,10</sup>; Lea Velsher, MD<sup>9</sup>; Jordan  
10  
11 Lerner Ellis, PhD<sup>11-13</sup>; Nancy N. Baxter, MD PhD<sup>2,14</sup>  
12  
13

14  
15 **Author Affiliations**  
16

17 [1] Division of General Surgery, Department of Surgery, University of Toronto, Toronto, ON,  
18  
19 Canada  
20

21 [2] Institute of Health Policy, Management, and Evaluation, University of Toronto, Toronto, ON,  
22  
23 Canada  
24

25 [3] Lawrence S. Bloomberg Faculty of Nursing, University of Toronto, Toronto, ON, Canada  
26

27 [4] Division of Biostatistics, Dalla Lana School of Public Health, University of Toronto,  
28  
29 Toronto, ON, Canada  
30

31 [5] ICES, Toronto, ON, Canada  
32

33 [6] Department of Surgery, St. Michael's Hospital, Toronto, ON, Canada  
34

35 [7] Odette Cancer Centre, Sunnybrook Health Sciences Centre, Toronto, ON, Canada  
36

37 [8] Department of Paediatric Laboratory Medicine, The Hospital for Sick Children, Toronto, ON,  
38  
39 Canada  
40

41 [9] Genetics Program, North York General Hospital, Toronto, ON, Canada  
42

43 [10] Department of Pediatrics, University of Toronto, Toronto, ON, Canada  
44

45 [11] Laboratory Medicine and Pathobiology, University of Toronto, Toronto, ON, Canada  
46

47 [12] Lunenfeld-Tanenbaum Research Institute, Sinai Health System, Toronto, ON, Canada  
48  
49  
50  
51  
52  
53  
54  
55  
56  
57  
58  
59  
60

1  
2  
3 [13] Pathology and Laboratory Medicine, Mount Sinai Hospital, Sinai Health System, Toronto,  
4  
5 ON, Canada  
6

7 [14] Melbourne School of Population and Global Health, University of Melbourne, Melbourne,  
8  
9 Victoria, Australia  
10

11  
12 **Corresponding Author:** Dr. Nancy Baxter, MD, PhD, Melbourne School of Population and  
13  
14 Global Health, 5<sup>th</sup> floor 207 Bouverie Street, Melbourne, Victoria, Australia, 3053 |

15  
16  
17 [Nancy.Baxter@unimelb.edu.au](mailto:Nancy.Baxter@unimelb.edu.au)  
18

19 **Author Contributions:** FD, KM, RS, AE, KC, JLE, and NNB contributed to concept and design  
20  
21 of the cohort. FD, KM, TL, AE, KC, WSM, LV, JLE, and NNB participated in data acquisition.  
22  
23 FD analyzed the data. FD, KM, RS, NNB contributed to data interpretation. KM, RS, and NNB  
24  
25 provided administrative support and supervision. NNB obtained funding. FD drafted the  
26  
27 manuscript. All authors critically revised the manuscript and provided final approval.  
28  
29

30  
31 **Acknowledgments/Funding Statement:** This study was supported by ICES, which is funded by  
32  
33 an annual grant from the Ontario Ministry of Health and Long-Term Care (MOHLTC). This  
34  
35 study also received funding from the Canadian Cancer Society (grant #315358), the American  
36  
37 College of Surgeons Resident Research Scholarship, and Canadian Institutes of Health Research  
38  
39 Post-Doctoral Fellowship Award. Parts of this material are based on data and information  
40  
41 compiled and provided by Cancer Care Ontario (CCO) and Canadian Institute for Health  
42  
43 Information (CIHI). The analyses, conclusions, opinions, and statements expressed herein are  
44  
45 solely those of the authors and do not reflect those of the funding or data sources; no  
46  
47 endorsement is intended or should be inferred.  
48  
49

50  
51 **Conflicts of Interest:** None to disclose  
52

53  
54 **Word Count:** Abstract = 248/250 | Body = 2,500/2,500 | Tables & Figures = 6  
55  
56  
57  
58  
59  
60

## Abstract

*Background:* Our understanding of the implications of *BRCA1/BRCA2* mutations and the uptake and effectiveness of cancer risk-reduction strategies comes largely from studies of women recruited from specialized genetics clinics, with limited generalizability. Additionally, how genetic testing influences healthcare decisions of women found to carry variants of uncertain significance or those testing negative is unknown. This paper describes the What Comes Next Cohort, a unique data platform collecting real-world information on women undergoing *BRCA1/BRCA2* testing, irrespective of test result.

*Methods:* Detailed demographic, genetic testing, and family history data were collected for adult women who underwent *BRCA1/BRCA2* testing in Ontario, Canada from 2007 to 2016 through chart review. These data were linked with population-based administrative health databases to longitudinally track healthcare utilization and outcomes. We evaluated the demographics of the cohort, indications for testing, and test results.

*Results:* We identified 15,986 women (mean age 52.5 years, SD 13.9) who underwent *BRCA1* and/or *BRCA2* testing, including 2,033 women who tested positive, 1,175 women with variants of uncertain significance, and 12,778 women who tested negative. The positive yield among Ashkenazi Jewish founder testing, predictive testing (for familial variants), and complete gene analysis were 10.4%, 41.0%, and 7.4%, respectively. Among women negative for Ashkenazi Jewish founder mutations who subsequently underwent complete gene analysis, 3.0% tested positive for alternate pathogenic/likely pathogenic variants in the *BRCA1* or *BRCA2* genes.

*Interpretation:* The What Comes Next Cohort provides a rich resource for researchers interested in evaluating real-world healthcare behaviours and outcomes of women who undergo *BRCA1/BRCA2* testing.

## Introduction

Carriers of pathogenic variants in the *BRCA1/BRCA2* genes face elevated risks of breast and ovarian cancer,<sup>1</sup> and cancer-related mortality; however, early identification of women harbouring variants can mitigate risks. For women affected by cancer, genetic testing can guide treatment, e.g. by identifying individuals who may benefit from poly(ADP-ribose) polymerase inhibitors. When performed among women unaffected by cancer, genetic testing can identify candidates for high-risk breast cancer screening and prophylactic surgery.<sup>2-4</sup>

Despite availability of *BRCA1/BRCA2* testing, the impact on the health behaviours of women who undergo testing is not well understood. Studies that inform our understanding of the uptake of risk-reduction strategies among *BRCA1/BRCA2* mutation carriers have relied on patients recruited from specialized cancer or genetics clinics<sup>5,6</sup> and may not be generalizable to the broader population. Importantly, while there are some studies of cancer incidence, prevention, and outcomes for women with pathogenic *BRCA1/BRCA2* variants, our understanding of the implications of variants of uncertain significance (VUS) and negative test results (received by most women tested) is limited. We lack consensus on the benefit of increased surveillance and prophylactic surgery for these women, and this uncertainty can lead to variability in care.<sup>7</sup> Few large cohorts of women with VUS or negative results exist.<sup>8</sup>

The What Comes Next Cohort (WCNC) aims to provide researchers with near population-based data on women undergoing *BRCA1/BRCA2* testing. This unique data platform provides detailed genetic testing, family history, and health utilization/outcomes data for a large, unselected cohort of women who underwent testing over a 10-year period, irrespective of test result. Herein, we provide a description of the WCNC, including demographics and test results.

## Methods

## Overview

Since 2000, the Ontario Ministry of Health (MOH) has funded *BRCA1/BRCA2* testing.<sup>9</sup> In 2001, thirteen eligibility criteria for testing based on personal and family cancer history were established. Similar to criteria used elsewhere,<sup>10</sup> Ontario criteria were chosen with the intention of identifying individuals with  $\geq 10\%$  carrier probability. To assemble the WCNC, we abstracted charts at hospitals performing *BRCA1/BRCA2* testing to obtain demographic, family cancer history, and genetic testing information for women tested. We used unique encoded identifiers to deterministically link records to administrative health databases housed at ICES (formerly the Institute for Clinical Evaluative Sciences), an independent, non-profit research institute that collects and analyzes healthcare and demographic data for health system evaluation and improvement. Data captured in the WCNC and data available for future linkages are presented in

### **Table 1.**

## *Participants*

The protocol for development of the WCNC has previously been described<sup>11</sup>; eligibility criteria are summarized here. We identified adult women ( $\geq 18$  years) who underwent *BRCA1/BRCA2* testing between January 1, 2007 and April 30, 2016 at two provincial genetic testing laboratories (North York General Hospital [NYGH], Mount Sinai Hospital [MSH]). Together, these sites perform approximately 70% of *BRCA1/BRCA2* testing provincially, capturing women referred from geographically dispersed counselling centres. Women were required to have a physician order genetic testing and a genetic counselor submit a requisition form indicating testing indication, and a pedigree detailing personal and family cancer history.

## *Genetic Testing*

1  
2  
3 From patient charts at MSH and NYGH, we extracted reason for testing, type of test  
4 performed, and result. Test types included: (1) predictive/familial testing for a specific variant  
5 known to be carried by a family member, (2) founder testing for three variants carried in highest  
6 frequency among the Ashkenazi Jewish population (*BRCA1* c.68\_69delAG, c.5266dupC; *BRCA2*  
7 c.5946delT), or (3) complete analysis, defined as sequencing of coding region and splice sites  
8 using Sanger sequencing, next generation sequencing, or analysis by denaturing high-  
9 performance liquid chromatography (DHPLC), and deletion/duplication detection by multiplex  
10 ligation-dependent probe amplification (MLPA).  
11  
12  
13  
14  
15  
16  
17  
18  
19  
20

21 For women who underwent predictive testing, we categorized results as Positive or  
22 Predictive Negative based on whether the known familial variant was detected. For women who  
23 underwent Ashkenazi Jewish founder testing, results were categorized as Positive or Negative.  
24 For women who underwent complete analysis, test results were reported by the testing site using  
25 the 2007 and 2015 American College of Medical Genetics (ACMG) classification systems  
26 (ACMG).<sup>12,13</sup> We categorized pathogenic (ACMG category 1) and likely pathogenic (ACMG  
27 category 2) variants as Positive results; ACMG category 3 variants as VUS; and likely benign  
28 (ACMG category 4) and benign (ACMG category 5) variants as Negative results. We captured  
29 results of prior *BRCA1/BRCA2* testing if reported to or performed at the genetic testing sites,  
30 applying the same categorization system.  
31  
32  
33  
34  
35  
36  
37  
38  
39  
40  
41  
42  
43

#### 44 *Family Cancer History*

45 We abstracted information on history of breast and ovarian cancer among first- and  
46 second-degree relatives from detailed pedigrees included with requisition forms. First-degree  
47 relatives were defined as parents, siblings, or children; second-degree relatives were defined as  
48 grandparents, grandchildren, aunts, uncles, nieces, nephews, and half-siblings.  
49  
50  
51  
52  
53  
54  
55  
56  
57  
58  
59  
60

### *Demographic and Personal Cancer History*

From genetic testing requisition forms and pedigrees, we obtained women's ethnicity, Ashkenazi Jewish ancestry, and number of biological children. Linkage with administrative databases at ICES allowed collection of additional demographic variables. We obtained postal codes for women using the Registered Persons Database (RPDB), categorizing women as living within urban (population  $\geq 10,000$ ) or rural ( $< 10,000$ ) areas at the time of testing. We used Ontario census data to determine the median neighborhood household income level, categorizing women living in urban areas into 5 groups by quintile. We determined degree of marginalization using the census-based Ontario Marginalization Index (ONMARG), which captures extent of material deprivation, residential instability, ethnic concentration, and dependency.<sup>14</sup> We measured healthcare utilization using the Aggregated Diagnosis Groups (ADGs) of the Johns Hopkins Adjusted Clinical Group (ACG)<sup>®</sup> System Version 10.0 (Johns Hopkins University),<sup>15</sup> with a two-year look-back period.

The Ontario Cancer Registry (OCR) has collected data on all incident invasive cancers, excluding non-melanoma skin cancers, since 1964 and is over 95% complete.<sup>16</sup> We used OCR to determine cancer history prior to genetic testing and cancer occurrence afterwards. We included fallopian tube and primary peritoneal cancers in our definition of ovarian cancer.

### *Follow-Up*

Follow-up began on the date of the genetic test and continues until the earliest of death or last follow-up in administrative data. Vital status was identified through RPDB.

### *Statistical Analysis*

We determined baseline characteristics of women in the WCNC at the time of their most recent genetic test. Continuous data are reported as mean (SD) and categorical data are reported

1  
2  
3 as frequencies (percentages). Groups were compared using ANOVA and chi-squared tests.  
4  
5 Reported p-values are two-sided. Analyses were performed at ICES using R, version 3.3. In  
6  
7 accordance with ICES policies, we suppressed cells with <6 individuals.  
8  
9

### 10 *Ethics Approval*

11  
12 This study received approval from the Research Ethics Boards at MSH, NYGH,  
13  
14 Sunnybrook Health Sciences Centre, and the University of Toronto.  
15  
16

### 17 **Results**

18  
19 The WCNC includes 15,986 women who underwent *BRCA1/BRCA2* testing between  
20  
21 2007 and 2016 (**Figure 1**), among whom 2,329 (14.6%) underwent predictive testing, 2,072  
22  
23 (13.0%) underwent Ashkenazi Jewish founder testing, and 11,585 (72.5%) underwent complete  
24  
25 *BRCA1/BRCA2* gene analysis. The cohort includes 2,033 (12.7%) women who tested positive,  
26  
27 1,175 (7.4%) women with a VUS, 11,437 (71.5%) women who tested negative on founder  
28  
29 testing or complete analysis, and 1,341 (8.4%) women who tested negative on predictive testing.  
30  
31  
32

33 **Table 2** summarizes cohort demographics. The mean age of women in the cohort is 52.5  
34  
35 years (SD 13.9); 12.1% of women tested lived in urban neighbourhoods belonging to the lowest  
36  
37 fifth income group, whereas 28.0% lived in urban neighbourhoods in the highest fifth income  
38  
39 group. Although chart abstraction was performed at only two hospitals, women captured in the  
40  
41 WCNC resided across the province of Ontario (**Figure 2**). As of September 2019, median  
42  
43 follow-up was 5.9 years and total person-years of follow-up was 100,438 years.  
44  
45  
46

### 47 *Test Results*

48  
49 Among the 2,033 (12.7%) women who received a positive result, 50.9% (n = 1,035) had  
50  
51 pathogenic/likely pathogenic variants in *BRCA1*, 48.7% (n = 990) in *BRCA2*, and 0.4% (n = 8) in  
52  
53  
54  
55  
56  
57  
58  
59  
60



1  
2  
3 both *BRCA1* and *BRCA2*. Positive yields among founder testing, predictive testing, and complete  
4 analysis were 10.4% (n = 216), 41.0% (n = 955), and 7.4% (n = 862), respectively.  
5  
6

7  
8 A VUS was identified in 9.9% of women undergoing complete analysis (n = 1,142);  
9  
10 another 33 women underwent predictive testing for and were found to carry a familial VUS.  
11  
12 Among women with a VUS, 376 (32.0%) women carried a variant in *BRCA1*, 754 (64.2%)  
13 women in *BRCA2*, and 45 (3.8%) women in both *BRCA1* and *BRCA2*.  
14  
15

16  
17 743 (4.6%) women had undergone multiple *BRCA1/BRCA2* tests; 403 women with a  
18 negative Ashkenazi Jewish founder test also underwent complete gene analysis (either  
19 reflexively or subsequently). The positive yield of complete analysis in these women was 3.0%  
20 (n = 12); VUS were identified in 35 (8.9%) women.  
21  
22  
23

#### 24 25 26 *Indications for Testing* 27

28  
29 Testing indications, based on MOH criteria, are presented in **Table 3**. The most common  
30 indications were women with breast/ovarian cancer from families with 3 or more breast/ovarian  
31 cancer cases (n = 5,293, 33.1%) and testing in a relative of a *BRCA1/BRCA2* carrier (n = 2,394,  
32 15.0%); 2,105 (13.2%) women were tested because of a pedigree strongly suggestive of  
33 hereditary breast or ovarian cancer. The criterion with the greatest positive yield was testing  
34 undertaken in relatives of *BRCA1/BRCA2* carriers (n = 860, 35.9%), followed by testing among  
35 women with breast/ovarian cancer from families with 2 cases of ovarian cancer among first- or  
36 second-degree relatives (n = 52, 26.7%), and women with invasive serous ovarian cancer (n =  
37 195, 14.7%). Although testing criteria were developed to capture women with  $\geq 10\%$  risk of  
38 testing positive, 6 criteria had  $< 10\%$  positive yield, one of which had  $< 5\%$  yield. Criteria with  
39 lowest yield included testing of women with pedigrees suggesting  $> 10\%$  risk of carrying a  
40  
41  
42  
43  
44  
45  
46  
47  
48  
49  
50  
51  
52  
53  
54  
55  
56  
57  
58  
59  
60

1  
2  
3 pathogenic variant (n = 93, 4.4%) and Ashkenazi Jewish women with breast cancer and a family  
4 history of breast/ovarian cancer (n = 38, 5.5%).  
5  
6

### 7 *Personal Cancer History*

8  
9  
10 A history of prior cancer was present among 10,345 (64.7%) women undergoing testing.  
11  
12 8,517 (53.3%) women had a diagnosis of breast cancer (**Table 4**). The mean age at breast cancer  
13 diagnosis was 49.72 years (SD 11.79) and was highest among women with a predictive negative  
14 result (mean 55.60, SD 13.59). 197 (8.6%) women undergoing predictive testing had a history of  
15 breast cancer prior to testing. Women undergoing predictive testing who had a history of breast  
16 cancer more often received a positive result than women without a breast cancer history (75.6%  
17 vs. 24.4%,  $p < 0.0001$ ). For women undergoing non-predictive testing, a greater proportion of  
18 women without a history of breast cancer received a positive result than women with a history of  
19 breast cancer (9.0% vs. 7.0%,  $p = 0.005$ ). This was expected as women who undergo non-  
20 predictive testing in the absence of breast cancer likely have other high risk factors, such as  
21 ovarian cancer or a strong family history. Women testing positive were younger at breast cancer  
22 diagnosis than women who received VUS or negative results (44.5 years for positive, 48.8 years  
23 for VUS, 50.3 years for negative,  $p < 0.0001$ ).  
24  
25  
26  
27  
28  
29  
30  
31  
32  
33  
34  
35  
36  
37  
38  
39

40 1,589 (9.9%) women had a history of ovarian cancer prior to genetic testing (**Table 4**).  
41  
42 Among women undergoing non-predictive testing, those with a history of ovarian cancer more  
43 often received a positive result than those without ovarian cancer (16.9% vs. 6.7%,  $p < 0.0001$ ).  
44  
45 Women testing positive were diagnosed with ovarian cancer at a younger age than women  
46 receiving VUS or negative results (53.9 for positive, 56.4 for VUS, 60.0 for negative,  $p < 0.0001$ ).  
47  
48  
49  
50

### 51 *Family Cancer History*

1  
2  
3 Family history of breast cancer in first- or second-degree relatives was present for 70.3%  
4 (n = 11,241) of women (**Table 4**). Proportionally more women undergoing predictive testing had  
5 a first-degree relative with breast cancer than women undergoing founder or complete analysis  
6 (52.6%, 43.2%, 46.0%, respectively;  $p < 0.0001$ ). Among women undergoing non-predictive  
7 testing, those with first-degree relatives with breast cancer tested positive as often as those with  
8 second-degree relatives with breast cancer (7.2% and 7.9%, respectively;  $p = 0.11$ ).  
9

10  
11  
12 Family history of ovarian cancer in first- or second-degree relatives was present for  
13 23.2% (n = 3,705) of women tested (**Table 4**). The predictive testing group were most likely to  
14 have a first-degree relative affected by ovarian cancer (20.5% for predictive, 8.2% for founder,  
15 11.6% for complete analysis;  $p < 0.0001$ ). Among women undergoing non-predictive testing,  
16 similar proportions of women with affected first- and second-degree relatives tested positive  
17 (12.8% and 11.0%, respectively;  $p = 0.13$ ).  
18  
19  
20  
21  
22  
23  
24  
25  
26  
27  
28  
29  
30

### 31 **Interpretation**

32  
33 The WCNC captures approximately 70% of women in Ontario who underwent  
34 *BRCA1/BRCA2* testing over a 10-year period within a publicly-funded genetic testing program.  
35  
36 The cohort includes nearly 16,000 women, with large numbers of previously understudied  
37 women with VUS and negative results. Despite the provincial goal of testing women with  $\geq 10\%$   
38 carrier probability, we identified 6 testing criteria with  $< 10\%$  positive yield, and one criterion  
39 with  $< 5\%$  yield. Additionally, 3% of women who received negative results from Ashkenazi  
40 founder testing and underwent complete gene analysis carried pathogenic/likely pathogenic  
41 variants.  
42  
43  
44  
45  
46  
47  
48  
49  
50

51 To date, most data important to understanding cancer development and prevention among  
52 women at high risk for breast/ovarian cancer has come from highly specialized genetics clinics.  
53  
54  
55  
56  
57  
58  
59  
60

1  
2  
3 Capture of data solely from women motivated to attend these clinics may overestimate uptake of  
4 risk-reduction strategies. Real-world data have been difficult to obtain as factors important to  
5 understanding cancer development and prevention, e.g. family history and genetic testing  
6 results,<sup>17</sup> are not routinely collected in administrative datasets. Additionally, it can be  
7 challenging to acquire and follow a large group of women with VUS or negative results in a  
8 prospective fashion. Through a combination of detailed chart abstraction and linkage with  
9 administrative datasets, the WCNC overcomes these challenges.

10  
11  
12  
13  
14  
15  
16  
17  
18  
19 Although genetic testing was captured at two sites in Toronto, Canada, women included  
20 in the cohort came from many jurisdictions from wide-spread genetic counseling centres. As  
21 testing was provincially funded throughout the duration of the study period, affordability of  
22 testing did not limit access. By capturing indication for testing, we were able to assess the  
23 performance of testing criteria. For future studies, linkage to administrative datasets in Ontario  
24 enables tracking of all healthcare utilization (i.e. ambulatory care visits, hospital admissions,  
25 surgeries, chemotherapy, radiation therapy) before and after genetic testing with minimal  
26 attrition over long-term follow-up. Uniquely, our cohort includes all women tested, not just those  
27 with a positive result.

### 28 29 30 31 32 33 34 35 36 37 38 39 *Limitations*

40  
41  
42 Despite these strengths, the cohort does have limitations. During chart review, we were  
43 unable to identify members of a family who were undergoing testing and, therefore, could not  
44 track cascade testing. Although we captured the genetic test result, we cannot be certain of how  
45 results were communicated; this may be particularly important in understanding healthcare  
46 decisions made by women who received VUS or negative results.<sup>18</sup> Finally, our cohort only  
47 includes women who have undergone *BRCA1* and/or *BRCA2* testing; we do not have data on  
48  
49  
50  
51  
52  
53  
54  
55  
56  
57  
58  
59  
60

1  
2  
3 men who underwent *BRCA1/BRCA2* testing or any individuals who underwent panel testing  
4  
5 (implemented in Ontario in 2016).  
6

### 7 *Conclusion*

8  
9  
10 The WCNC is a unique data platform that provides a source of broadly generalizable data  
11 that can be used in future studies to evaluate cancer risk, cancer treatment, and use of cancer  
12 risk-reduction strategies among women who have undergone *BRCA1/BRCA2* testing, irrespective  
13 of test result. This cohort provides the ability to perform comparative studies of women with  
14 varying test results with a sufficiently large sample size to evaluate rare outcomes and has the  
15 potential to significantly further our understanding of hereditary cancers and their treatment and  
16 prevention.  
17  
18  
19  
20  
21  
22  
23  
24  
25  
26  
27  
28  
29  
30

31 **Data Sharing Statement:** The dataset from this study is held securely in coded form at ICES.

32  
33 While data sharing agreements prohibit ICES from making the dataset publicly available, access  
34 may be granted to those who meet pre-specified criteria for confidential access, available at  
35 [www.ices.on.ca/DAS](http://www.ices.on.ca/DAS). The full dataset creation plan and underlying analytic code are available  
36 from the authors upon request, understanding that the computer programs may rely upon coding  
37 templates or macros that are unique to ICES and are therefore either inaccessible or may require  
38 modification.  
39  
40  
41  
42  
43  
44  
45  
46  
47  
48  
49  
50  
51  
52  
53  
54  
55  
56  
57  
58  
59  
60

## References

1. Kuchenbaecker KB, Hopper JL, Barnes DR, et al. Risks of breast, ovarian, and contralateral breast cancer for BRCA1 and BRCA2 mutation carriers. *Jama*. 2017;317(23):2402-2416.
2. National Comprehensive Cancer Network. Genetic/Familial High-Risk Assessment: Breast, Ovarian, and Pancreatic (Version 1.2020). December; 2019.
3. Li X, You R, Wang X, et al. Effectiveness of prophylactic surgeries in BRCA1 or BRCA2 mutation carriers: a meta-analysis and systematic review. *Clinical Cancer Research*. 2016;22(15):3971-3981.
4. Ludwig KK, Neuner J, Butler A, Geurts JL, Kong AL. Risk reduction and survival benefit of prophylactic surgery in BRCA mutation carriers, a systematic review. *The American Journal of Surgery*. 2016;212(4):660-669.
5. Manchanda R, Burnell M, Abdelraheim A, et al. Factors influencing uptake and timing of risk reducing salpingo-oophorectomy in women at risk of familial ovarian cancer: a competing risk time to event analysis. *Bjog*. 2012;119(5):527-536.
6. Metcalfe K, Eisen A, Senter L, et al. International trends in the uptake of cancer risk reduction strategies in women with a BRCA1 or BRCA2 mutation. *British Journal of Cancer*. 2019;1.
7. Kurian AW, Li Y, Hamilton AS, et al. Gaps in Incorporating Germline Genetic Testing Into Treatment Decision-Making for Early-Stage Breast Cancer. *J Clin Oncol*. 2017;35(20):2232-2239.
8. Kotsopoulos J, Metcalfe K, Alston J, et al. Prospective study of high-risk, BRCA1/2-mutation negative women: the 'negative study'. *BMC Cancer*. 2014;14:221.
9. Provincial Predictive Genetic Testing Service for Hereditary Breast, Ovarian and Colon Cancers. .  
<http://www.health.gov.on.ca/en/pro/programs/ohip/bulletins/4352/bul4352.aspx>. Accessed April 2, 2020.
10. National Institute for Health and Care Excellence (NICE). Familial breast cancer: classification, care and managing breast cancer and related risks in people with a family history of breast cancer.
11. Dossa F, Cusimano MC, Sutradhar R, et al. Real-world health services utilisation and outcomes after BRCA1 and BRCA2 testing in Ontario, Canada: the What Comes Next Cohort Study protocol. *BMJ open*. 2018;8(9):e025317.
12. Richards CS, Bale S, Bellissimo DB, et al. ACMG recommendations for standards for interpretation and reporting of sequence variations: Revisions 2007. *Genetics in Medicine*. 2008;10(4):294-300.
13. Richards S, Aziz N, Bale S, et al. Standards and guidelines for the interpretation of sequence variants: a joint consensus recommendation of the American College of Medical Genetics and Genomics and the Association for Molecular Pathology. *Genetics in medicine*. 2015;17(5):405-423.
14. Matheson F, Dunn J, Smith K, Moineddin R, Glazier R. Ontario marginalization index (ON-Marg): user guide. *Toronto: Centre for Research in Inner City Health, St Michael's Hospital*. 2011.

- 1
  - 2
  - 3
  - 4
  - 5
  - 6
  - 7
  - 8
  - 9
  - 10
  - 11
  - 12
  - 13
  - 14
  - 15
  - 16
  - 17
  - 18
  - 19
  - 20
  - 21
  - 22
  - 23
  - 24
  - 25
  - 26
  - 27
  - 28
  - 29
  - 30
  - 31
  - 32
  - 33
  - 34
  - 35
  - 36
  - 37
  - 38
  - 39
  - 40
  - 41
  - 42
  - 43
  - 44
  - 45
  - 46
  - 47
  - 48
  - 49
  - 50
  - 51
  - 52
  - 53
  - 54
  - 55
  - 56
  - 57
  - 58
  - 59
  - 60
15. Weiner JP, Abrams C, Bodycombe D. The Johns Hopkins ACG case-mix system version 6.0 release notes. *Baltimore: Johns Hopkins Bloomberg School of Public Health*. 2003.
16. Robles SC, Marrett LD, Clarke EA, Risch HA. An application of capture-recapture methods to the estimation of completeness of cancer registration. *Journal of clinical epidemiology*. 1988;41(5):495-501.
17. Knerr S, Bowles EJ, Leppig KA, Buist DS, Gao H, Wernli KJ. Trends in BRCA test utilization in an integrated health system, 2005–2015. *JNCI: Journal of the National Cancer Institute*. 2019;111(8):795-802.
18. Vos J, Oosterwijk JC, Gómez-García E, et al. Perceiving cancer-risks and heredity-likelihood in genetic-counseling: how counselees recall and interpret BRCA 1/2-test results. *Clin Genet*. 2011;79(3):207-218.

Confidential

1  
2  
3  
4 **Table Legend**  
5

6 **Table 1.** Variables measured in the What Comes Next Cohort and variables available through  
7 future planned linkages  
8

9  
10  
11 **Table 2.** Baseline characteristics of the What Comes Next Cohort measured at the time of  
12 genetic testing  
13

14  
15  
16 **Table 3.** Indications for and yield of testing by Ontario Ministry of Health (MOH) testing criteria  
17

18 **Table 4.** Family and personal cancer history by test result. Results are reported as n (row %) or  
19 mean (SD)  
20  
21

22  
23  
24  
25 **Figure Legend**  
26

27 **Figure 1.** The What Comes Next Cohort  
28

29  
30 **Figure 2.** Number of women captured by the What Comes Next Cohort by geographic region in  
31 Ontario. Colours represent number of women included in the cohort per 100,000 women living  
32 within each region, based on population estimates from 2016  
33  
34  
35  
36  
37  
38  
39  
40  
41  
42  
43  
44  
45  
46  
47  
48  
49  
50  
51  
52  
53  
54  
55  
56  
57  
58  
59  
60



**Table 1.** Variables measured in the What Comes Next Cohort and variables available for future planned linkages

| Category                       | Source        | Variables                                                                                         | Baseline                      | Follow-up |   |
|--------------------------------|---------------|---------------------------------------------------------------------------------------------------|-------------------------------|-----------|---|
| Demographics                   | Chart review  | Ethnicity                                                                                         | ✓                             |           |   |
|                                |               | Ashkenazi Jewish ancestry                                                                         | ✓                             |           |   |
|                                |               | Number of biological children                                                                     | ✓                             |           |   |
|                                | RPDB          | Age                                                                                               | ✓                             | ✓         |   |
|                                |               | Vital status                                                                                      | ✓                             | ✓         |   |
|                                |               | Urban vs. rural neighbourhood                                                                     | ✓                             | ✓         |   |
|                                |               | Neighbourhood income quintile                                                                     | ✓                             | ✓         |   |
|                                |               | ONMARG                                                                                            | Ontario Marginalization Index | ✓         | ✓ |
|                                |               | CIC                                                                                               | Immigration status            | ✓         | ✓ |
|                                | Comorbidities | ORGD                                                                                              | Cause of death                |           | ✓ |
| CIHI-DAD, NACRS, OHIP, SDS     |               | Aggregated Diagnosis Groups                                                                       | ✓                             | ✓         |   |
| Comorbidity-specific datasets* |               | Asthma, hypertension, diabetes, rheumatoid arthritis, kidney disease, COPD, stroke, HIV, dementia | ✓                             | ✓         |   |
|                                |               |                                                                                                   | ✓                             | ✓         |   |
| Genetic testing                | Chart review  | Date of genetic counseling                                                                        | ✓                             |           |   |
|                                |               | Site of genetic counseling                                                                        | ✓                             |           |   |
|                                |               | Results from previous testing                                                                     | ✓                             |           |   |
|                                |               | Reason for testing                                                                                | ✓                             |           |   |
|                                |               | Date of testing                                                                                   | ✓                             |           |   |
|                                |               | Site of testing                                                                                   | ✓                             |           |   |
|                                |               | Test type                                                                                         | ✓                             |           |   |
|                                |               | Test result                                                                                       | ✓                             |           |   |
| Family cancer history          | Chart review  | Number of 1 <sup>st</sup> -degree maternal relatives with breast cancer                           | ✓                             |           |   |
|                                |               | Number of 2 <sup>nd</sup> -degree maternal relatives with breast cancer                           | ✓                             |           |   |
|                                |               | Number of 1 <sup>st</sup> -degree maternal relatives with ovarian cancer                          | ✓                             |           |   |
|                                |               | Number of 2 <sup>nd</sup> -degree maternal relatives with ovarian cancer                          | ✓                             |           |   |
|                                |               | Number of 1 <sup>st</sup> -degree paternal relatives with breast cancer                           | ✓                             |           |   |
|                                |               | Number of 2 <sup>nd</sup> -degree paternal relatives with breast cancer                           | ✓                             |           |   |
|                                |               | Number of 1 <sup>st</sup> -degree paternal relatives with ovarian cancer                          | ✓                             |           |   |
| Personal cancer history        | Chart review  | Type of cancer                                                                                    | ✓                             |           |   |
|                                |               | Stage at diagnosis                                                                                | ✓                             |           |   |
|                                |               | Age at diagnosis                                                                                  | ✓                             |           |   |

|                                                  |                     |                                              |   |   |
|--------------------------------------------------|---------------------|----------------------------------------------|---|---|
|                                                  |                     | Date of cancer diagnosis                     | ✓ | ✓ |
| Personal cancer history                          | OCR                 | Morphologic type                             | ✓ | ✓ |
|                                                  |                     | Histologic type                              | ✓ | ✓ |
|                                                  |                     | Stage at diagnosis                           | ✓ | ✓ |
|                                                  |                     | Age                                          | ✓ | ✓ |
| Treating physicians                              | CPDB                | Specialty                                    | ✓ | ✓ |
|                                                  |                     | Years in practice                            | ✓ | ✓ |
|                                                  |                     | Hospital number                              | ✓ | ✓ |
| Hospitals                                        | INST                | Hospital setting (academic vs. non-academic) | ✓ | ✓ |
|                                                  |                     | Date of admission                            | ✓ | ✓ |
| Hospital admissions*                             | CIHI-DAD            | Reason for admission                         | ✓ | ✓ |
|                                                  |                     | Length of stay                               | ✓ | ✓ |
|                                                  |                     | Date of visit                                | ✓ | ✓ |
| Emergency department visits*                     | NACRS               | Reason for visit                             | ✓ | ✓ |
|                                                  |                     | Type of surgery                              | ✓ | ✓ |
| Surgical history                                 | OHIP, CIHI-DAD, SDS | Date of surgery                              | ✓ | ✓ |
|                                                  |                     | Date of imaging                              | ✓ | ✓ |
| Breast or pelvic screening or diagnostic imaging | OHIP, OBSP          | Date of biopsy                               | ✓ | ✓ |
|                                                  |                     | Body region radiated                         | ✓ | ✓ |
|                                                  |                     | Dates of planning and treatment              | ✓ | ✓ |
| Radiation treatment*                             | ALR, OHIP           | Course of treatment                          | ✓ | ✓ |
|                                                  |                     | Dose per fraction                            | ✓ | ✓ |
|                                                  |                     | Intent of treatment                          | ✓ | ✓ |
|                                                  |                     | Date of treatment                            | ✓ | ✓ |
|                                                  |                     | Line of therapy                              | ✓ | ✓ |
| Chemotherapy*                                    | ALR, NDFP           | Intent of treatment                          | ✓ | ✓ |
|                                                  |                     | Drug administered                            | ✓ | ✓ |
|                                                  |                     | Dose administered                            | ✓ | ✓ |

\*Requires linkages not yet performed but available for future studies

Abbreviations: ALR, Cancer Activity Level Reporting; CIC, Citizenship and Immigration Canada; CIHI, Canadian Institutes of Health Information; CPDB, Corporate Provider Database; DAD, Discharge Abstract Database; INST, Institution Information System; NACRS, National Ambulatory Care Reporting System; NDFP, New Drug Funding Program; OBSP, Ontario Breast Screening Program; OCR, Ontario Cancer Registry; OHIP, Ontario Health Insurance Plan; ONMARG, Ontario Marginalization Database; ORGD, Office of the Registrar General-Deaths; RPDB, Registered Persons Database; SDS, Same Day Surgery

**Table 2.** Baseline characteristics of the What Comes Next Cohort measured at the time of genetic testing (n = 15,986)

| Characteristic                        |               |
|---------------------------------------|---------------|
| Age, mean (SD)                        | 52.51 (13.92) |
| Ethnicity <sup>a</sup> , n (%)        |               |
| European                              | 10,130 (63.4) |
| Southeast Asian                       | 1,048 (6.6)   |
| Central/South Asian or Middle Eastern | 1,282 (8.0)   |
| African/Caribbean                     | 606 (3.8)     |
| Latin/Hispanic                        | 495 (3.1)     |
| Other                                 | 1,107 (6.9)   |
| Unknown                               | 1,378 (8.6)   |
| Ashkenazi Jewish, n (%)               | 2,946 (18.4)  |
| Neighbourhood Income                  |               |
| Rural                                 | 1,340 (8.4)   |
| Urban, lowest fifth                   | 1,940 (12.1)  |
| Urban, second fifth                   | 2,378 (14.9)  |
| Urban, third fifth                    | 2,522 (15.8)  |
| Urban, fourth fifth                   | 3,298 (20.6)  |
| Urban, highest fifth                  | 4,481 (28.0)  |
| Marginalization, mean (SD)            | 3.03 (0.77)   |
| ADGs                                  |               |
| 0-5                                   | 2,938 (18.4)  |
| 6-7                                   | 3,051 (19.1)  |
| 8-10                                  | 4,714 (29.5)  |
| ≥11                                   | 5,283 (33.0)  |
| Biological children, n (%)            |               |
| Yes                                   | 11,702 (73.2) |
| No                                    | 2,411 (15.1)  |
| Unknown                               | 1,873 (11.7)  |
| Year of testing, n (%)                |               |
| 2007-2009                             | 2,793 (17.5)  |
| 2010-2012                             | 4,616 (28.9)  |
| 2013-2016                             | 8,577 (53.7)  |
| Test type, n (%)                      |               |
| Founder testing                       | 2,072 (13.0)  |

1  
2  
3  
4  
5  
6  
7  
8  
9  
10  
11  
12  
13  
14  
15  
16  
17  
18  
19  
20  
21  
22  
23  
24  
25  
26  
27  
28  
29  
30  
31  
32  
33  
34  
35  
36  
37  
38  
39  
40  
41  
42  
43  
44  
45  
46  
47  
48  
49  
50  
51  
52  
53  
54  
55  
56  
57  
58  
59  
60

|                     |               |
|---------------------|---------------|
| Predictive testing  | 2,329 (14.6)  |
| Complete analysis   | 11,585 (72.5) |
| Test result, n (%)  |               |
| Positive            | 2,033 (12.7)  |
| VUS                 | 1,175 (7.4)   |
| Negative            | 11,437 (71.5) |
| Predictive negative | 1,341 (8.4)   |

---

Abbreviations: VUS, variant of uncertain significance; ADGs, Aggregated Diagnosis Groups  
<sup>a</sup>Women may belong to >1 ethnic group; ethnicity and Ashkenazi Jewish ancestry are not mutually exclusive

Confidential

**Table 3.** Indications for and yield of testing by Ontario Ministry of Health (MOH) testing criteria

| <b>MOH Testing Criterion*</b>                                      |                                                                                                                                                                                                                                                  | <b>All tested</b><br>(n = 15,986) | <b>Positive</b><br>(n = 2,033) | <b>VUS</b><br>(n = 1,175) | <b>Negative</b><br>(n = 11,437) |
|--------------------------------------------------------------------|--------------------------------------------------------------------------------------------------------------------------------------------------------------------------------------------------------------------------------------------------|-----------------------------------|--------------------------------|---------------------------|---------------------------------|
| <b>Affected individuals</b>                                        |                                                                                                                                                                                                                                                  |                                   |                                |                           |                                 |
| <i>At least one case of cancer:</i>                                |                                                                                                                                                                                                                                                  |                                   |                                |                           |                                 |
| MOH1:                                                              | Ashkenazi Jewish and breast cancer <50 years, or ovarian cancer at any age                                                                                                                                                                       | 435                               | 39 (9.0)                       | 24 (5.5)                  | 366 (84.1)                      |
| MOH2:                                                              | Breast cancer <35 years of age                                                                                                                                                                                                                   | 1,036                             | 123 (11.9)                     | 108 (10.4)                | 801 (77.3)                      |
| MOH4:                                                              | Invasive serous ovarian cancer at any age                                                                                                                                                                                                        | 1,327                             | 195 (14.7)                     | 104 (7.8)                 | 1,027 (77.4)                    |
| <i>At least two cases of cancer on the same side of the family</i> |                                                                                                                                                                                                                                                  |                                   |                                |                           |                                 |
| MOH5:                                                              | Breast cancer <60 years and a first- or second-degree relative with ovarian cancer or male breast cancer                                                                                                                                         | 1,143                             | 147 (12.9)                     | 115 (10.1)                | 880 (77.0)                      |
| MOH6:                                                              | Breast and ovarian cancer in the same individual, or bilateral breast cancer with the first case <50 years                                                                                                                                       | 976                               | 127 (13.0)                     | 86 (8.8)                  | 763 (78.1)                      |
| MOH7:                                                              | Two cases of breast cancer, both <50 years, in first- or second-degree relatives                                                                                                                                                                 | 1,508                             | 134 (8.9)                      | 160 (10.6)                | 1,210 (80.2)                    |
| MOH8:                                                              | Two cases of ovarian cancer, any age, in first- or second-degree relatives                                                                                                                                                                       | 195                               | 52 (26.7)                      | 17 (8.7)                  | 122 (62.6)                      |
| MOH9:                                                              | Ashkenazi Jewish and breast cancer at any age, and any family history of breast or ovarian cancer                                                                                                                                                | 691                               | 38 (5.5)                       | 29 (4.2)                  | 621 (89.9)                      |
| <i>At least 3 cases of cancer on the same side of the family</i>   |                                                                                                                                                                                                                                                  |                                   |                                |                           |                                 |
| MOH10:                                                             | Three or more cases of breast or ovarian cancer at any age                                                                                                                                                                                       | 5,293                             | 355 (6.7)                      | 454 (8.6)                 | 4,467 (84.4)                    |
| <b>Unaffected individuals</b>                                      |                                                                                                                                                                                                                                                  |                                   |                                |                           |                                 |
| MOH11:                                                             | Relative of individual with known <i>BRCA1</i> or <i>BRCA2</i> mutation**                                                                                                                                                                        | 2,394                             | 860 (35.9)                     | 27 (1.1)                  | 237 (9.9)                       |
| MOH12:                                                             | Ashkenazi Jewish and first- or second-degree relative of individual with: breast cancer <50 years, or ovarian cancer at any age, or male breast cancer, or breast cancer at any age, with no positive family history of breast or ovarian cancer | 1,277                             | 92 (7.2)                       | 4 (0.3)                   | 1,130 (88.5)                    |
| MOH13:                                                             | A pedigree strongly suggestive of hereditary breast/ovarian cancer i.e. risk of carrying a mutation for the individual being tested is >10%                                                                                                      | 2,105                             | 93 (4.4)                       | 175 (8.3)                 | 1,830 (86.9)                    |

\* MOH3 (male breast cancer) excluded from table

\*\* 94.7% of women with a predictive negative result were tested under MOH11; therefore, results are not shown for the predictive negative group

Note: women may have had multiple indications for testing selected; indication for testing missing for 859 women

**Table 4.** Family and personal cancer history by test result. Results are reported as n (row %) or mean (SD)

|                                                                            | Predictive Testing*   |                         | Non-predictive Testing     |                       |                             |
|----------------------------------------------------------------------------|-----------------------|-------------------------|----------------------------|-----------------------|-----------------------------|
|                                                                            | Positive<br>(n = 955) | Negative<br>(n = 1,341) | Positive<br>(n =<br>1,078) | VUS<br>(n =<br>1,175) | Negative<br>(n =<br>11,437) |
| <i>Family Cancer History</i>                                               |                       |                         |                            |                       |                             |
| <b>Breast Cancer</b>                                                       |                       |                         |                            |                       |                             |
| 1 <sup>st</sup> -degree relatives with breast cancer                       |                       |                         |                            |                       | 5,269                       |
| 1 relative                                                                 | 524 (43.7)            | 675 (56.3)              | 449 (7.2)                  | 530 (8.5)             | (84.3)                      |
| ≥2 relatives                                                               | 413 (44.2)            | 521 (55.8)              | 362 (7.3)                  | 409 (8.2)             | 4,201 (84.5)                |
| 2 <sup>nd</sup> -degree relatives with breast cancer                       | 111 (41.9)            | 154 (58.1)              | 87 (6.8)                   | 121 (9.5)             | 1,068 (83.7)                |
| 1 relative                                                                 | 545 (42.1)            | 749 (57.9)              | 501 (7.9)                  | 540 (8.5)             | 5,275 (83.5)                |
| ≥2 relatives                                                               | 322 (43.0)            | 426 (57.0)              | 325 (8.0)                  | 337 (8.3)             | 3,378 (83.6)                |
| 1 <sup>st</sup> - or 2 <sup>nd</sup> -degree relatives with breast cancer  | 223 (40.8)            | 323 (59.2)              | 176 (7.7)                  | 203 (8.9)             | 1,897 (83.3)                |
| 1 relative                                                                 | 769 (42.3)            | 1,050 (57.7)            | 717 (7.6)                  | 802 (8.5)             | 7,903 (83.9)                |
| ≥2 relatives                                                               | 329 (42.5)            | 445 (57.5)              | 340 (7.7)                  | 367 (8.3)             | 3,708 (84.0)                |
|                                                                            | 440 (42.1)            | 605 (57.9)              | 377 (7.5)                  | 435 (8.7)             | 4,195 (83.8)                |
| <b>Ovarian Cancer</b>                                                      |                       |                         |                            |                       |                             |
| 1 <sup>st</sup> -degree relative with ovarian cancer                       |                       |                         |                            |                       | 1,187                       |
| 1 relative                                                                 | 216 (45.8)            | 256 (54.2)              | 195 (12.8)                 | 142 (9.3)             | (77.9)                      |
| ≥2 relatives                                                               | 195 (45.8)            | 231 (54.2)              | 184 (12.8)                 | 131 (9.1)             | 1,123 (78.1)                |
| 2 <sup>nd</sup> -degree relative with ovarian cancer                       | 21 (45.7)             | 25 (54.3)               | 11 (12.8)                  | 11 (12.8)             | 64 (74.4)                   |
| 1 relative                                                                 | 225 (40.5)            | 330 (59.5)              | 175 (11.0)                 | 144 (9.1)             | 1,267 (79.9)                |
| ≥2 relatives                                                               | 189 (41.7)            | 264 (58.3)              | 158 (11.4)                 | 122 (8.8)             | 1,107 (79.8)                |
| 1 <sup>st</sup> - or 2 <sup>nd</sup> -degree relatives with ovarian cancer | 36 (35.3)             | 66 (64.7)               | 17 (8.5)                   | 22 (11.1)             | 160 (80.4)                  |
| 1 relative                                                                 | 392 (42.8)            | 523 (57.2)              | 323 (11.6)                 | 255 (9.2)             | 2,212 (79.3)                |
| ≥2 relatives                                                               | 301 (43.7)            | 388 (56.3)              | 259 (11.4)                 | 195 (8.6)             | 1,820 (80.0)                |
|                                                                            | 91 (40.3)             | 135 (59.7)              | 64 (12.4)                  | 60 (11.6)             | 392 (76.0)                  |
| <i>Personal Cancer History</i>                                             |                       |                         |                            |                       |                             |
| <b>Breast Cancer</b>                                                       |                       |                         |                            |                       |                             |
| Unaffected at time of testing                                              |                       |                         |                            |                       | 4,893                       |
| Affected at time of testing                                                | 806 (38.4)            | 1,293 (61.6)            | 531 (9.0)                  | 457 (7.8)             | (83.2)                      |
| Age at diagnosis, mean (SD)                                                | 149 (75.6)            | 48 (24.4)               | 547 (7.0)                  | 718 (9.2)             | 6,544 (83.8)                |
|                                                                            | 47.15 (12.79)         | 55.60 (13.59)           | 44.45 (10.59)              | 48.82 (12.11)         | 50.30 (11.70)               |

|                                    |                        |                            |                  |                  |                    |
|------------------------------------|------------------------|----------------------------|------------------|------------------|--------------------|
| <b>Ovarian Cancer</b>              |                        |                            |                  |                  |                    |
| Unaffected at time of testing      | 920-925<br>(40.7-40.9) | 1,335-1,341<br>(59.1-59.3) | 817 (6.7)        | 1,044<br>(8.6)   | 10,289<br>(84.7)   |
| Affected at time of testing        | 30-35 (85.7-<br>100)   | <6 (0-14.3)                | 261 (16.9)       | 131 (8.5)        | 1,148<br>(74.5)    |
| Age at diagnosis, <i>mean (SD)</i> | 54.57 (12.75)          | -                          | 53.90<br>(9.60)  | 56.39<br>(13.54) | 60.00<br>(12.08)   |
| <b>Other cancers</b>               |                        |                            |                  |                  |                    |
| Pancreas                           | -                      | -                          | 7 (6.6)          | 10 (9.4)         | 89 (84.0)          |
| Colorectal                         | -                      | -                          | 7 (9.6-<br>10.3) | <6 (0-6.8)       | 61 (83.6-<br>89.7) |
| Endometrial                        | -                      | -                          | 7 (6.0)          | 14 (12.1)        | 95 (81.9)          |
| Other                              | -                      | -                          | 18 (3.8)         | 26 (5.5)         | 428 (90.7)         |
| <b>Number of cancers</b>           |                        |                            |                  |                  |                    |
| 0                                  | 736 (37.3)             | 1,237 (62.7)               | 266 (7.1)        | 287 (7.7)        | 3,190<br>(85.2)    |
| 1                                  | 199 (68.2)             | 93 (31.8)                  | 704 (7.9)        | 815 (9.1)        | 7,415<br>(83.0)    |
| ≥2                                 | 20 (64.5)              | 11 (35.5)                  | 108 (10.7)       | 73 (7.2)         | 832 (82.1)         |

Abbreviations: VUS, variant of uncertain significance

Values for small cells presented as ranges or suppressed to prevent back-calculation

\*33 women underwent predictive testing for and were found to carry a VUS previously identified among a family member; these women are included in the VUS column

Note, values suppressed where cell size <6

1  
2  
3  
4  
5  
6  
7  
8  
9  
10  
11  
12  
13  
14  
15  
16  
17  
18  
19  
20  
21  
22  
23  
24  
25  
26  
27  
28  
29  
30  
31  
32  
33  
34  
35  
36  
37  
38  
39  
40  
41  
42  
43  
44  
45  
46  
47

**Figure 1.** The What Comes Next Cohort

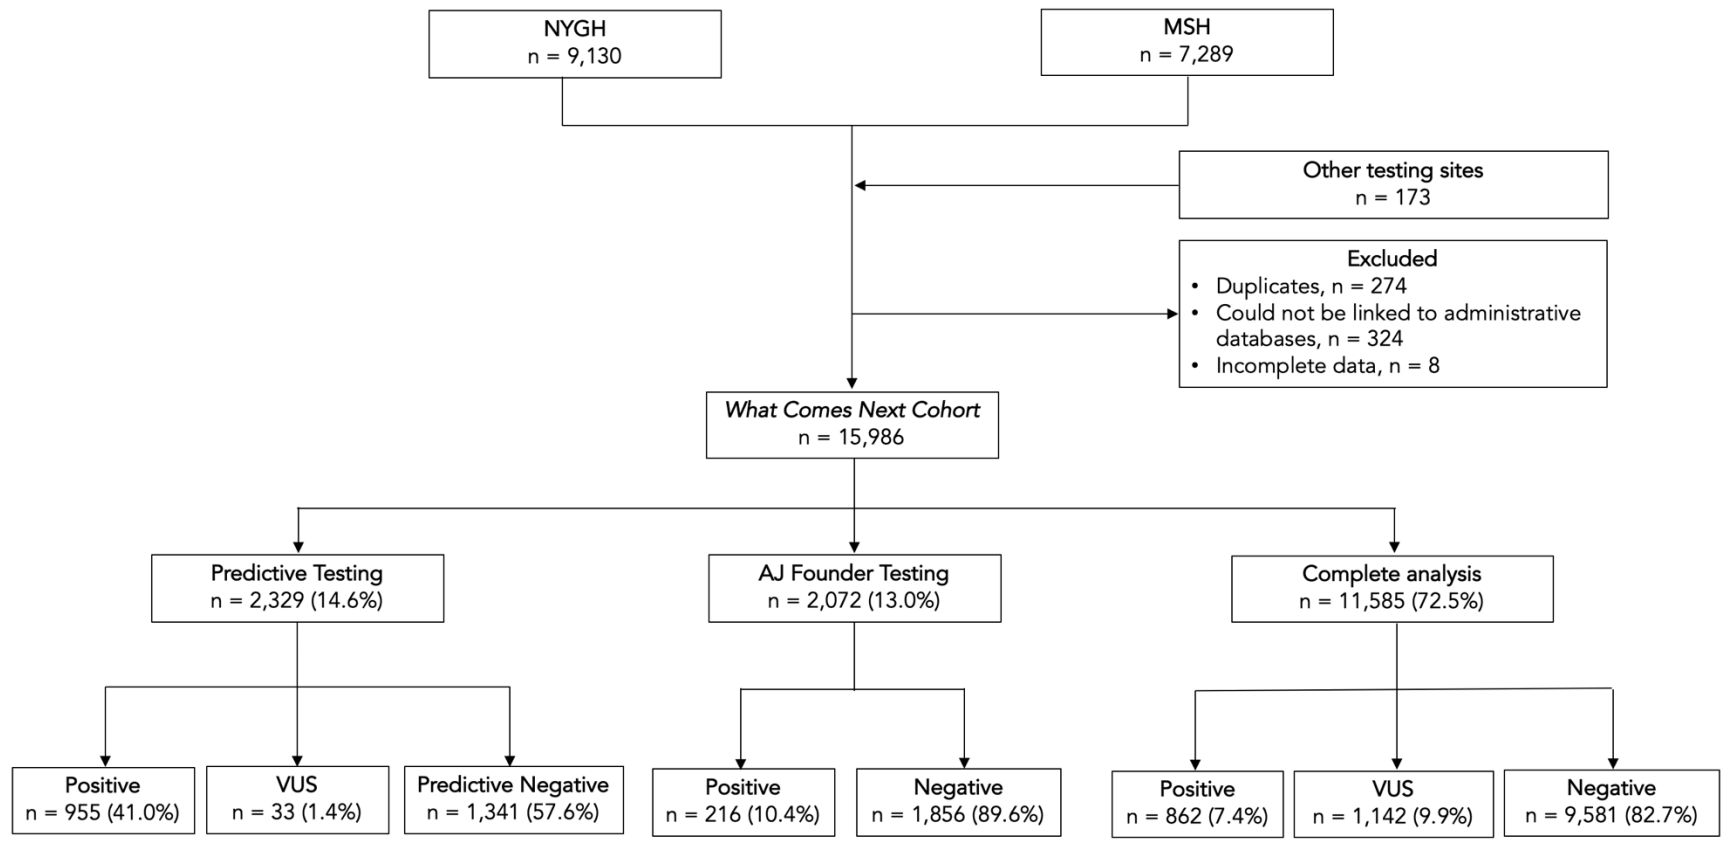

Abbreviations: NYGH, North York General Hospital; MSH, Mount Sinai Hospital; AJ, Ashkenazi Jewish; VUS, variant of uncertain significance



**Figure 2.** Number of women captured by the What Comes Next Cohort by geographic region in Ontario. Colours represent number of women included in the cohort per 100,000 women living within each region, based on population estimates from 2016

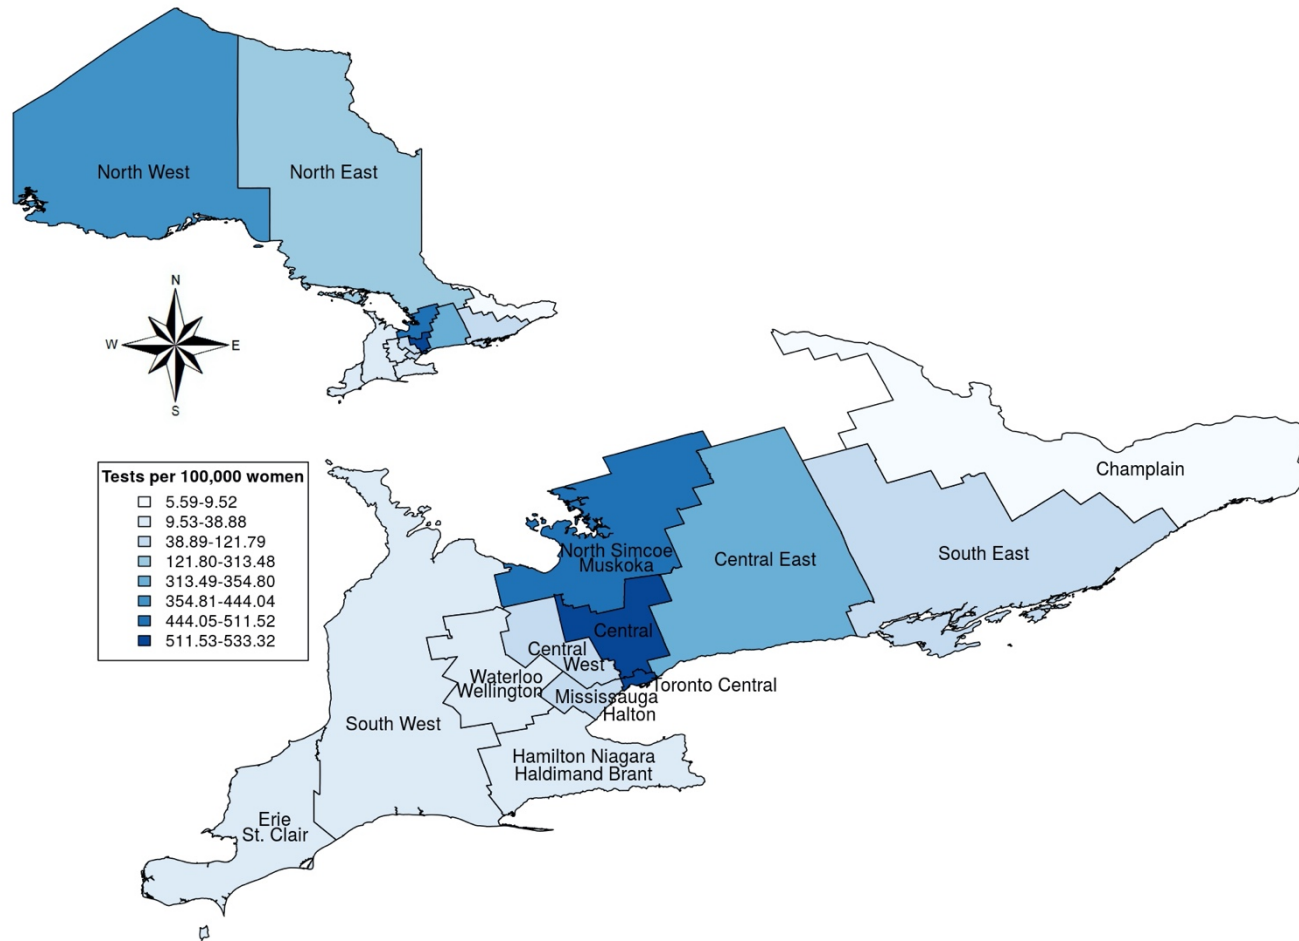

Population estimates obtained from: Statistics Canada. [Table 17-10-0088-01 Estimates of population \(2011 Census and administrative data\), by age group and sex for July 1st, Canada, provinces, territories, health regions \(2015 boundaries\) and peer groups](#)

DOI: <https://doi.org/10.25318/1710008801-eng>
